# Supplementary material for: Identification of novel Lynch syndrome mutations in Chinese patients with endometriod endometrial cancer
Source: PubMed Central journal article supplement (PMC7309470; doi:10.20892/j.issn.2095-3941.2019.0295), 2020-05-15
Supplement: cbm-17-458-s001.pdf [file cbm-17-458-s001.pdf]

## Supplementary materials

### Details of the prediction methods

PolyPhen-2 (<http://genetics.bwh.harvard.edu/pph2/>) scores ranged from 0.0 (tolerated) to 1.0 (deleterious). Variants with scores of 0.0 were predicted to be benign, and those with scores closer to 1.0 were more confidently predicted to be deleterious. The score can be interpreted as follows: variants with scores in the 0.0–0.15 range were predicted to be benign; variants with scores in the 0.15–1.0 range were possibly damaging;

and variants with scores in the 0.85–1.0 range were confidently predicted to be damaging. Sift (<http://sift.jcvi.org/>) and PolyPhen-2 scores used the same range of 0.0–1.0 but had opposite meanings: variants with scores in the 0.0–0.05 range were considered deleterious; variants with scores closer to 0.0 were more confidently predicted to be deleterious; variants with scores in the 0.05–1.0 range were predicted to be tolerated (benign); and variants with scores very close to 1.0 were confidently predicted to be tolerated.

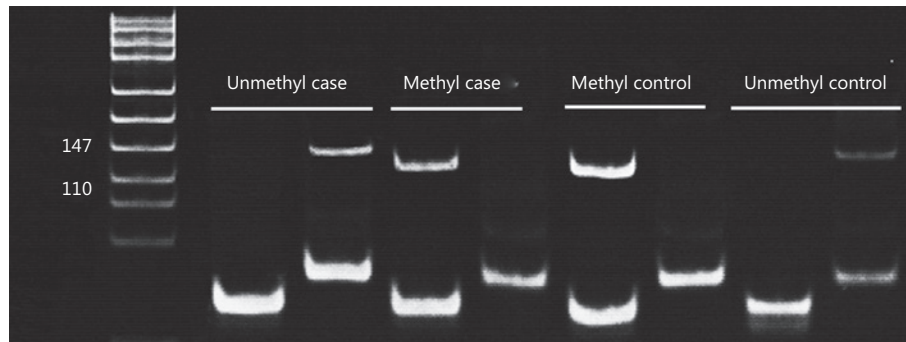

**Figure S1** Methylation testing for MLH1 in MLH1 loss cases. Lane 1, 2: unmethylated MLH1 in EEC sample; Lane 3, 4: methylated MLH1 in EEC sample; Lane 5, 6: methylated MLH1 positive control; Lane 7, 8: unmethylated MLH1 control.

**Table S1** Clinicopathologic features by MMR expression in EEC

| Variables                      | MMR-retained cases, n (%) | MMR-deficient cases, n (%) | P     |
|--------------------------------|---------------------------|----------------------------|-------|
| EEC                            | 184 (87.20)               | 27 (12.80)                 |       |
| Age (median)                   |                           |                            |       |
| 54.64 (25–80)                  | 54.39 (25–80)             | 56.22 (31–76)              |       |
| <50                            | 56 (30.43)                | 6 (22.22)                  | 0.382 |
| ≥50                            | 128 (69.57)               | 21 (77.78)                 |       |
| Stage at initial diagnosis     | 141                       | 18                         |       |
| I/II                           | 127 (90.07)               | 17 (94.44)                 | 0.55  |
| III/IV                         | 14 (9.93)                 | 1 (5.56)                   |       |
| Grade (FIGO)                   | 181                       | 25                         |       |
| 1/2                            | 163 (90.06)               | 24 (96)                    | 0.336 |
| 3                              | 18 (9.94)                 | 1 (4)                      |       |
| Depth of myometrial invasion   | 151                       | 21                         |       |
| Superficial (<1/2)             | 109 (72.19)               | 15 (71.43)                 | 0.942 |
| Deep (≥1/2)                    | 42 (27.81)                | 6 (28.57)                  |       |
| Low uterus segment             | 131                       | 27                         | 0.137 |
| No                             | 113 (86.26)               | 21 (77.78)                 |       |
| Yes                            | 18 (13.74)                | 6 (22.22)                  |       |
| Lymphovascular invasion        | 155                       | 22                         |       |
| No                             | 141 (90.97)               | 21 (95.45)                 | 0.479 |
| Yes                            | 14 (9.03)                 | 1 (4.55)                   |       |
| Tumor infiltrating lymphocytes |                           |                            |       |
| No                             | 35 (23.18)                | 2 (9.1)                    | 0.28  |
| Yes                            | 116 (76.82)               | 20 (90.9)                  |       |
| Peritumoral lymphocytes        |                           |                            |       |
| No                             | 118 (85.51)               | 9 (81.82)                  | 0.74  |
| Yes                            | 20 (14.49)                | 2 (18.18)                  |       |

**Table S2** Features of MLH methylation in EEC

| Variables                      | Methylated MLH1, n (%) | Unmethylated MLH1, n (%) | P     |
|--------------------------------|------------------------|--------------------------|-------|
|                                | 13 (76.47)             | 4 (23.53)                |       |
| Age (median)                   | 56.46 (32–76)          | 55.75 (49–63)            | 0.856 |
| Stage at initial diagnosis     |                        |                          |       |
| I/II                           | 9 (90)                 | 3 (100)                  | 0.57  |
| III/IV                         | 1 (10)                 | 0 (0)                    |       |
| Grade (FIGO)                   |                        |                          |       |
| 1/2                            | 11 (91.67)             | 4 (100)                  | 0.55  |
| 3                              | 1 (8.33)               | 0 (0)                    |       |
| Depth of myometrial invasion   |                        |                          |       |
| Superficial (<1/2)             | 10 (81.82)             | 3 (75)                   | 0.423 |
| Deep (≥1/2)                    | 1 (18.18)              | 1 (25)                   |       |
| Lymphovascular invasion        |                        |                          |       |
| No                             | 10 (81.82)             | 3 (75)                   | 0.423 |
| Yes                            | 1 (18.18)              | 1 (25)                   |       |
| Low uterus segment             |                        |                          |       |
| No                             | 6 (60)                 | 3 (75)                   | 0.6   |
| Yes                            | 4 (40)                 | 1 (25)                   |       |
| Tumor infiltrating lymphocytes |                        |                          |       |
| No                             | 6 (60)                 | 3 (75)                   | 0.6   |
| Yes                            | 4 (40)                 | 1 (25)                   |       |
| Peritumoral lymphocytes        |                        |                          |       |
| No                             | 5 (71.43)              | 3 (75)                   | 0.9   |
| Yes                            | 2 (28.57)              | 1 (25)                   |       |
